# Supplementary material
Source: publisher site journal article supplement (https://www.spandidos-publications.com/3991/downloadSupplementary)

Figure S1. Dose response profile of total glucosides of paeony effect on the development of AR. (A) Levels of eosinophils, goblet cell count and percentage of collagen fibers were determined by hematoxylin-eosin, periodic acid-Schiff and Masson staining, respectively. (B) IgE concentration in the blood was examined by ELISA. (C) Sneezing and (D) nose rubbing frequency were measured in AR mice for 30 min. \* $P < 0.05$  and \*\* $P < 0.05$  vs. 0 mg/kg. AR, allergic rhinitis.

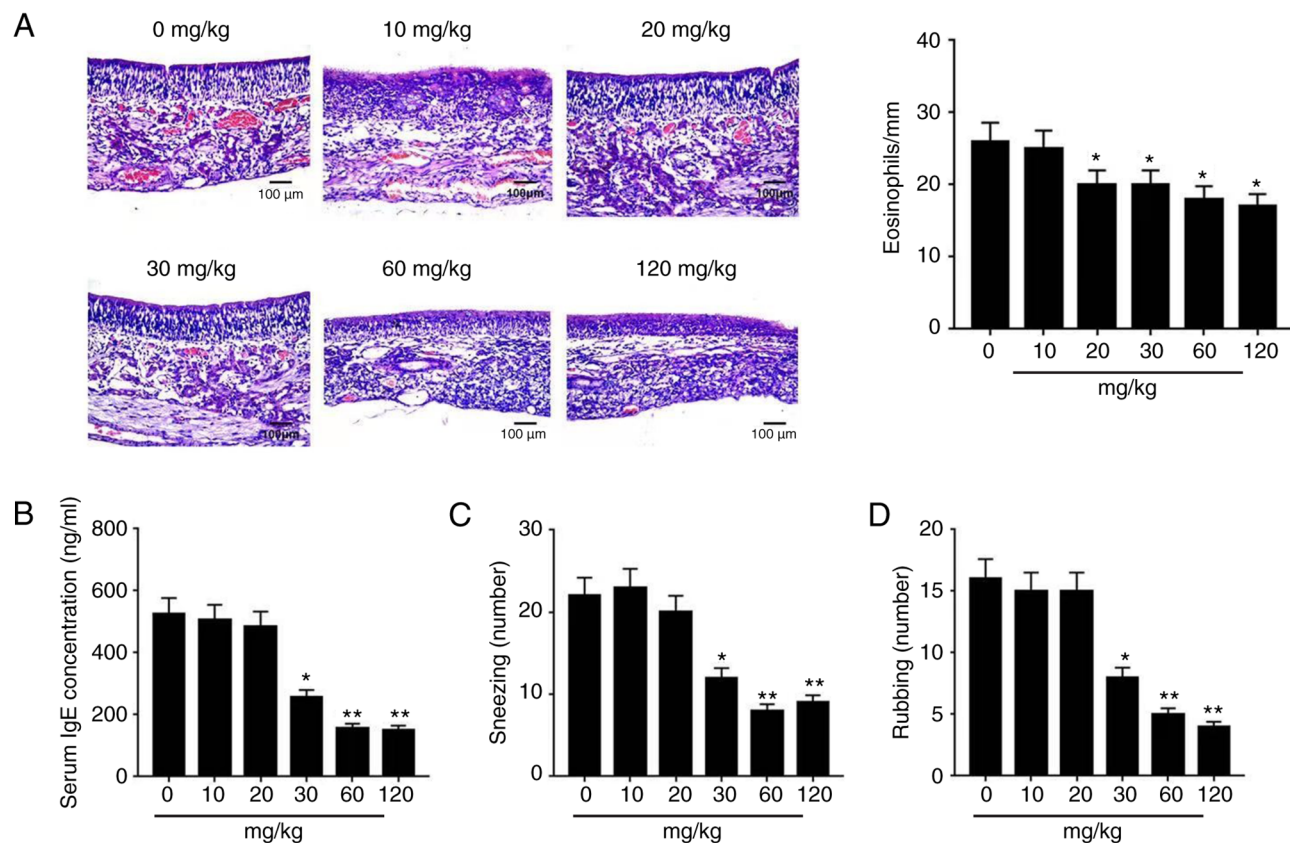

Supplement: Supplementary file 1 [file downloadSupplementary]
